# Supplementary material
Source: ML conference proceedings conference paper supplement (https://openaccess.thecvf.com/content/CVPR2026/html/Shao_Wavelet-Driven_3D_Anomaly_CVPR_2026_paper.html)
Supplement: Supplementary file 1 [file Shao_Wavelet-Driven_3D_Anomaly_CVPR_2026_supplemental.pdf]

# Wavelet-Driven 3D Anomaly Detection with Pose-Agnostic and Sparse-View Supplementary Materials

Mingwen Shao<sup>1,2</sup>    Qiao Zhang<sup>2\*</sup>    Xinyuan Chen<sup>2</sup>    Xiang Lv<sup>2</sup>    Lingzhuang Meng<sup>2</sup>  
Chang Liu<sup>2</sup>    Qinglin Zhan<sup>2</sup>    Ling Jian<sup>3</sup>

<sup>1</sup> Artificial Intelligence Research Institute, Shenzhen University of Advanced Technology

<sup>2</sup> Shandong Key Laboratory of Intelligent Oil & Gas Industrial Software, Qingdao Institute of Software, College of Computer Science and Technology, China University of Petroleum (East China)

<sup>3</sup> School of Economics and Management, China University of Petroleum (East China)

smw278@126.com, bz24070008@s.upc.edu.cn, b24070011@s.upc.edu.cn, lvxiang1997@126.com,  
lzhmeng1688@163.com, upc\_liuchang@163.com, s24070001@s.upc.edu.cn, bebetter@upc.edu.cn

## Overview

The supplementary material presents the following sections to strengthen the main manuscript:

**Sec. A** shows more ablation studies.

**Sec. B** shows more quantitative comparisons.

**Sec. C** shows more qualitative comparisons.

## A. Ablation Study

Table 5 presents the per-category ablation results on the PIAD\_synt (20%) dataset, evaluating the effectiveness of each proposed component: SWGM (Structure-aware Wavelet-optimized Gaussian Modeling), WPE (Wavelet-based Pose Estimator), and WDAD (Wavelet Difference-aware Anomaly Detector). Compared to the full model ("All"), the removal of any single component results in a performance decline in both pixel-level and image-level AUROC. Notably, the absence of WPE causes the most substantial drop, reducing the mean image-level AUROC from 82.34 to 78.65, underscoring the critical importance of Wavelet-based matching verification and pose optimization in addressing sparse-view challenges. The complete model consistently outperforms others across most object categories, highlighting the synergistic contributions of all three components.

## B. Quantitative Comparison

### Quantitative comparison of each category on MAD\_sim.

Table 1 and Table 2 report the per-category performance of Wave-Pose3D and three state-of-the-art PAD methods (OmniPoseAD [3], SplatPose [1], and PIAD [2]) on the MAD\_sim dataset under 10% and 20% sparse-view settings,

respectively. Across both configurations, our method consistently achieves the highest average AUROC at both pixel and image levels. Specifically, Wave-Pose3D attains a mean pixel-level AUROC of 94.0 and 95.1 under 10% and 20% settings, outperforming PIAD by 1.6% and 2.1%, respectively. At the image level, our approach yields 64.6 and 69.1 average AUROC, showing clear improvements over the best-performing baseline PIAD (60.2 and 64.5). Notably, our method achieves the highest scores in the majority of object categories (e.g., Gorilla, Pig, Bear, Scorpion), demonstrating its robustness in both fine-grained anomaly localization and holistic detection, even under severe view sparsity.

**Quantitative comparison of each category on PIAD\_synt.** Table 3 and Table 4 show per-category results on the PIAD\_synt dataset under 10% and 20% sparse-view settings. Across both configurations, Wave-Pose3D consistently outperforms OmniPoseAD, SplatPose, and PIAD on both pixel-level and image-level AUROC. At 10% sparsity, our method achieves a mean pixel AUROC of 96.3 and image AUROC of 73.2, surpassing the best baseline (PIAD) by 1.1% and 5.8%, respectively. When increasing to 20% views, Wave-Pose3D further improves to 97.8 (pixel) and 82.3 (image), ranking first in most categories and demonstrating strong robustness and generalization under limited view conditions.

## C. Qualitative comparison

Figure 1 shows a qualitative comparison with PIAD in a 20% sparse setting. It can be seen that our method can predict more accurate poses, reconstruct accurate and anomaly-free objects, and ultimately obtain precise positioning results.

\*Corresponding author

| Objects      | P_AUROC                   |                        |                  |                     | LAUROC                    |                        |                  |                     |
|--------------|---------------------------|------------------------|------------------|---------------------|---------------------------|------------------------|------------------|---------------------|
|              | OmniPoseAD<br>(NeurIPS23) | SplatPose<br>(CVPRW24) | PIAD<br>(CVPR25) | Wave-Pose3D<br>Ours | OmniPoseAD<br>(NeurIPS23) | SplatPose<br>(CVPRW24) | PIAD<br>(CVPR25) | Wave-Pose3D<br>Ours |
| 01Gorilla    | 88.1                      | 91.1                   | 92.5             | <b>95.2</b>         | 51.9                      | 53.9                   | 50.2             | <b>57.7</b>         |
| 02Unicorn    | 90.2                      | 90.8                   | 92.6             | <b>95.5</b>         | 52.6                      | 52.5                   | 53.4             | <b>69.4</b>         |
| 03Mallard    | 92.1                      | 91.2                   | 93.3             | <b>94.4</b>         | 59.2                      | 62.2                   | 64.2             | <b>65.6</b>         |
| 04Turtle     | 91.2                      | 90.8                   | 91.0             | <b>92.4</b>         | 55.5                      | 53.7                   | 59.4             | <b>66.1</b>         |
| 05Whale      | 88.6                      | 89.2                   | 92.0             | <b>93.6</b>         | 59.3                      | 63.8                   | <b>66.0</b>      | 58.9                |
| 06Bird       | 89.4                      | 91.1                   | 92.5             | <b>93.4</b>         | 51.4                      | 56.7                   | 53.8             | <b>59.8</b>         |
| 07Owl        | 91.2                      | 92.3                   | 94.1             | <b>94.7</b>         | 55.6                      | 56.2                   | 56.6             | <b>64.4</b>         |
| 08Sabertooth | 91.5                      | 91.8                   | 91.0             | <b>93.7</b>         | 54.3                      | 58.6                   | <b>61.9</b>      | 54.5                |
| 09Swan       | 85.4                      | 88.1                   | 92.3             | <b>96.4</b>         | 55.6                      | 61.3                   | 62.7             | <b>69.8</b>         |
| 10Sheep      | 94.3                      | 93.7                   | <b>94.9</b>      | 94.2                | 65.3                      | 62.8                   | 62.3             | <b>67.7</b>         |
| 11Pig        | 91.6                      | 93.7                   | 95.0             | <b>95.9</b>         | 59.7                      | 52.6                   | 61.9             | <b>65.5</b>         |
| 12Zalika     | 87.3                      | 89.6                   | 90.5             | <b>93.6</b>         | 60.5                      | 64.9                   | 64.7             | <b>66.8</b>         |
| 13Pheonix    | 85.7                      | 90.5                   | <b>94.2</b>      | 92.4                | 57.6                      | 59.7                   | 62.4             | <b>63.1</b>         |
| 14Elephant   | 83.1                      | 81.2                   | 83.9             | <b>87.5</b>         | 62.4                      | 61.9                   | 64.2             | <b>67.1</b>         |
| 15Parrot     | 86.2                      | 89.2                   | 90.0             | <b>94.4</b>         | 61.3                      | 62.6                   | <b>65.3</b>      | 59.8                |
| 16Cat        | 89.6                      | 91.4                   | <b>95.5</b>      | 95.1                | 56.3                      | 57.4                   | 57.5             | <b>70.3</b>         |
| 17Scorpion   | 88.2                      | 87.6                   | 89.9             | <b>91.8</b>         | 51.6                      | 53.4                   | 62.4             | <b>65.8</b>         |
| 18Obesobeso  | 90.2                      | 91.6                   | <b>96.3</b>      | 94.2                | 52.3                      | 54.6                   | 62.3             | <b>68.4</b>         |
| 19Bear       | 89.6                      | 91.2                   | 94.6             | <b>95.8</b>         | 60.3                      | 62.9                   | 62.3             | <b>67.7</b>         |
| 20Puppy      | 88.2                      | 89.1                   | 90.9             | <b>94.9</b>         | 57.2                      | 56.8                   | 52.1             | <b>63.4</b>         |
| Mean         | 89.1                      | 90.3                   | 92.4             | <b>94.0</b>         | 57.0                      | 58.4                   | 60.2             | <b>64.6</b>         |

Table 1. Quantitative comparison of each category on the MAD\_sim (10%) dataset. The best performance is highlighted in **bold**, while the second-best is underlined.

| Objects      | P_AUROC                   |                        |                  |                     | LAUROC                    |                        |                  |                     |
|--------------|---------------------------|------------------------|------------------|---------------------|---------------------------|------------------------|------------------|---------------------|
|              | OmniPoseAD<br>(NeurIPS23) | SplatPose<br>(CVPRW24) | PIAD<br>(CVPR25) | Wave-Pose3D<br>Ours | OmniPoseAD<br>(NeurIPS23) | SplatPose<br>(CVPRW24) | PIAD<br>(CVPR25) | Wave-Pose3D<br>Ours |
| 01Gorilla    | 88.3                      | 92.1                   | 93.5             | <b>96.4</b>         | 56.9                      | 55.4                   | 57.6             | <b>68.6</b>         |
| 02Unicorn    | 91.2                      | 90.8                   | 91.7             | <b>96.3</b>         | 57.6                      | 53.2                   | 56.8             | <b>76.7</b>         |
| 03Mallard    | 93.4                      | 93.2                   | <b>95.1</b>      | 94.6                | 63.2                      | 64.3                   | 67.6             | <b>68.2</b>         |
| 04Turtle     | 91.2                      | 90.8                   | 91.0             | <b>93.5</b>         | 56.5                      | 54.4                   | 59.4             | <b>68.2</b>         |
| 05Whale      | 89.4                      | 91.2                   | 93.0             | <b>93.4</b>         | 59.3                      | 65.4                   | <b>73.7</b>      | 66.3                |
| 06Bird       | 90.2                      | 92.1                   | 93.2             | <b>95.3</b>         | 58.4                      | 60.3                   | 59.1             | <b>62.8</b>         |
| 07Owl        | 93.6                      | 92.3                   | 94.9             | <b>96.6</b>         | 55.6                      | 54.2                   | 58.5             | <b>65.7</b>         |
| 08Sabertooth | 92.5                      | 91.8                   | 93.4             | <b>93.6</b>         | 56.3                      | 59.7                   | <b>73.3</b>      | 61.8                |
| 09Swan       | 86.4                      | 90.1                   | 92.2             | <b>95.5</b>         | 59.6                      | 62.3                   | 65.6             | <b>71.2</b>         |
| 10Sheep      | 95.3                      | 96.7                   | <b>97.3</b>      | 97.2                | 65.3                      | 68.5                   | 71.2             | <b>71.6</b>         |
| 11Pig        | 90.6                      | 93.7                   | 95.7             | <b>96.7</b>         | 59.7                      | 54.2                   | 61.3             | <b>68.7</b>         |
| 12Zalika     | 88.6                      | 89.6                   | 91.0             | <b>94.0</b>         | 60.5                      | 62.9                   | <b>71.1</b>      | 68.4                |
| 13Pheonix    | 86.2                      | 90.5                   | 92.9             | <b>93.2</b>         | 59.6                      | 58.3                   | 64.8             | <b>65.5</b>         |
| 14Elephant   | 85.1                      | 83.2                   | 85.1             | <b>90.8</b>         | 62.4                      | 61.2                   | 67.5             | <b>70.0</b>         |
| 15Parrot     | 87.4                      | 90.2                   | 92.3             | <b>94.7</b>         | 64.3                      | 65.3                   | <b>66.8</b>      | 66.4                |
| 16Cat        | 90.6                      | 93.4                   | 96.3             | <b>97.7</b>         | 60.3                      | 58.3                   | 63.2             | <b>70.7</b>         |
| 17Scorpion   | 89.6                      | 87.6                   | 89.9             | <b>93.7</b>         | 53.6                      | 54.9                   | 62.4             | <b>77.7</b>         |
| 18Obesobeso  | 91.6                      | 92.6                   | 96.3             | <b>97.2</b>         | 57.6                      | 56.3                   | 68.1             | <b>74.4</b>         |
| 19Bear       | 92.6                      | 91.2                   | 94.6             | <b>97.1</b>         | 65.3                      | 68.5                   | 64.0             | <b>70.8</b>         |
| 20Puppy      | 90.1                      | 89.3                   | 91.3             | <b>94.0</b>         | 61.2                      | 62.3                   | 57.6             | <b>68.6</b>         |
| Mean         | 90.2                      | 91.1                   | 93.0             | <b>95.1</b>         | 59.7                      | 60.0                   | 64.5             | <b>69.1</b>         |

Table 2. Quantitative comparison of each category on the PIAD\_synt (10%) dataset. The best performance is highlighted in **bold**, while the second-best is underlined.

## References

- [1] Mathis Kruse, Marco Rudolph, Dominik Woiwode, and Bodo Rosenhahn. Splatpose & detect: Pose-agnostic 3d anomaly detection. In *Proceedings of the IEEE/CVF Conference on Computer Vision and Pattern Recognition*, pages 3950–3960, 2024. 1
- [2] Kaichen Yang, Junjie Cao, Zeyu Bai, Zhixun Su, and Andrea Tagliasacchi. Piad: Pose and illumination agnostic anomaly detection. In *Proceedings of the Computer Vision and Pattern Recognition Conference*, pages 4734–4743, 2025. 1
- [3] Qiang Zhou, Weize Li, Lihan Jiang, Guoliang Wang, Guyue Zhou, Shanghang Zhang, and Hao Zhao. Pad: A dataset and

benchmark for pose-agnostic anomaly detection. *Advances in Neural Information Processing Systems*, 36:44558–44571, 2023. 1

| Objects   | P_AUROC                   |                        |                  |                     | LAUROC                    |                        |                  |                     |
|-----------|---------------------------|------------------------|------------------|---------------------|---------------------------|------------------------|------------------|---------------------|
|           | OmniPoseAD<br>(NeurIPS23) | SplatPose<br>(CVPRW24) | PIAD<br>(CVPR25) | Wave-Pose3D<br>Ours | OmniPoseAD<br>(NeurIPS23) | SplatPose<br>(CVPRW24) | PIAD<br>(CVPR25) | Wave-Pose3D<br>Ours |
| Axletree  | 94.3                      | 96.4                   | <u>97.0</u>      | <b>98.2</b>         | 64.4                      | 68.8                   | <u>73.7</u>      | <b>80.2</b>         |
| Box       | 92.8                      | <u>94.3</u>            | <b>95.7</b>      | <b>95.7</b>         | <u>63.2</u>               | 62.3                   | <u>52.3</u>      | <b>63.7</b>         |
| Can       | 96                        | <u>96.5</u>            | <u>97.9</u>      | <b>98.9</b>         | 74.5                      | 73.4                   | <u>84.0</u>      | <b>86.0</b>         |
| Chain     | 96.8                      | <u>98.0</u>            | <u>97.9</u>      | <b>98.2</b>         | 62.4                      | 61.2                   | <b>67.6</b>      | <u>64.6</u>         |
| Gear      | 93.4                      | <u>94.3</u>            | <u>93.4</u>      | <b>93.7</b>         | 57.4                      | 65.4                   | <b>70.4</b>      | <u>65.3</u>         |
| Keyring   | 96.5                      | 97.8                   | <u>98.8</u>      | <b>98.9</b>         | 68.3                      | 71.2                   | 70.3             | <b>76.2</b>         |
| Motor     | <u>89.7</u>               | 87.8                   | <u>85.8</u>      | <b>91.6</b>         | 50.2                      | <u>54.3</u>            | 52.3             | <b>64.6</b>         |
| Parts     | <u>94.3</u>               | 93.3                   | <u>94.6</u>      | <b>94.8</b>         | 53.9                      | 51.2                   | <u>60.2</u>      | <b>68.7</b>         |
| Picker    | <u>94.3</u>               | 93.2                   | <u>94.1</u>      | <b>94.5</b>         | 54.6                      | 56.9                   | <u>59.9</u>      | <b>65.5</b>         |
| Section   | <u>92.6</u>               | 96.5                   | <u>98.8</u>      | <b>99.1</b>         | 69.9                      | 73.4                   | <u>80.7</u>      | <b>85.2</b>         |
| Shaft     | 91.3                      | 95.4                   | <u>98.0</u>      | <b>98.5</b>         | 58.7                      | 64.3                   | <u>63.0</u>      | <b>77.9</b>         |
| Spray_can | 91.1                      | 98.7                   | <u>99.2</u>      | <b>99.4</b>         | 96.5                      | 95.6                   | <u>99.1</u>      | <b>99.3</b>         |
| Spring    | 90.9                      | 94.5                   | <u>95.9</u>      | <b>97.9</b>         | 70.7                      | 73.2                   | <u>77.0</u>      | <b>80.7</b>         |
| Sprockets | 89.7                      | <u>92.6</u>            | <u>91.4</u>      | <b>93.3</b>         | 50.4                      | 58.7                   | <u>65.2</u>      | <b>78.8</b>         |
| Amphora   | 87.6                      | <u>90.2</u>            | <b>92.5</b>      | <u>92.3</u>         | 48.9                      | <u>65.4</u>            | <u>54.6</u>      | <b>57.1</b>         |
| Teapot    | 90.2                      | 91.1                   | <u>92.1</u>      | <b>94.4</b>         | 45.6                      | <u>49.9</u>            | 48.6             | <b>57.9</b>         |
| Mean      | 92.6                      | 94.4                   | 95.2             | <b>96.3</b>         | 61.9                      | 65.3                   | 67.4             | <b>73.2</b>         |

Table 3. Quantitative comparison of each category on the PIAD\_synt (10%) dataset. The best performance is highlighted in **bold**, while the second-best is underlined.

| Objects   | P_AUROC                   |                        |                  |                     | LAUROC                    |                        |                  |                     |
|-----------|---------------------------|------------------------|------------------|---------------------|---------------------------|------------------------|------------------|---------------------|
|           | OmniPoseAD<br>(NeurIPS23) | SplatPose<br>(CVPRW24) | PIAD<br>(CVPR25) | Wave-Pose3D<br>Ours | OmniPoseAD<br>(NeurIPS23) | SplatPose<br>(CVPRW24) | PIAD<br>(CVPR25) | Wave-Pose3D<br>Ours |
| Axletree  | 95.2                      | 96.3                   | 98.3             | <b>98.7</b>         | 67.6                      | 78.8                   | 83.0             | <b>84.3</b>         |
| Box       | 94.1                      | 94.4                   | 96.5             | <b>99.0</b>         | 63.4                      | 65.4                   | 58.9             | <b>81.7</b>         |
| Can       | 96.6                      | 97.6                   | 98.9             | <b>99.1</b>         | 89.2                      | 92.5                   | <b>93.5</b>      | 93.1                |
| Chain     | 96.2                      | 97.8                   | 98.2             | <b>98.3</b>         | 65.4                      | 67.8                   | <b>75.8</b>      | 72.6                |
| Gear      | 91.4                      | 92.1                   | 94.3             | <b>94.8</b>         | 78.8                      | 81.1                   | 88.5             | <b>90.3</b>         |
| Keyring   | 95.4                      | 97.1                   | 98.9             | <b>99.2</b>         | 68.7                      | 71.2                   | <b>83.5</b>      | 80.8                |
| Motor     | 90.1                      | 91.2                   | 90.6             | <b>96.8</b>         | 61.3                      | 63.2                   | 67.8             | <b>79.6</b>         |
| Parts     | 94.4                      | 95.5                   | 95.2             | <b>97.6</b>         | 62.6                      | 58.9                   | 68.0             | <b>82.2</b>         |
| Picker    | 91.2                      | 92.3                   | 94.9             | <b>96.9</b>         | 63.0                      | 53.2                   | 61.0             | <b>75.3</b>         |
| Section   | 96.4                      | 97.5                   | 98.9             | <b>99.3</b>         | 75.6                      | 77.7                   | 82.1             | <b>92.5</b>         |
| Shaft     | 94.3                      | 97.3                   | <b>98.9</b>      | 98.6                | 76.5                      | 78.2                   | <b>88.4</b>      | 79.5                |
| Spray_can | 97.6                      | 98.9                   | 99.2             | 99.5                | 95.6                      | 97.8                   | 99.1             | <b>99.4</b>         |
| Spring    | 94.3                      | 97.4                   | <b>98.9</b>      | 98.8                | 71.0                      | 72.2                   | 77.6             | <b>83.8</b>         |
| Sprockets | 91.2                      | 93.9                   | 93.9             | <b>97.2</b>         | 67.5                      | 69.8                   | 75.5             | <b>89.0</b>         |
| Amphora   | 91.2                      | 92.1                   | 93.5             | <b>94.8</b>         | 52.3                      | 54.3                   | 57.9             | <b>62.0</b>         |
| Teapot    | 91.3                      | 91.4                   | 92.8             | <b>95.4</b>         | 56.7                      | 54.1                   | 45.5             | <b>71.4</b>         |
| Mean      | 93.8                      | 95.3                   | 96.4             | <b>97.8</b>         | 69.7                      | 71.0                   | 75.4             | <b>82.3</b>         |

Table 4. Quantitative comparison of each category on the PIAD\_synt (20%) dataset. The best performance is highlighted in **bold**, while the second-best is underlined.

| Object    | Baseline |       | w/o SWGM |             | w/o WPE     |             | w/o WDAD    |             | All          |              |
|-----------|----------|-------|----------|-------------|-------------|-------------|-------------|-------------|--------------|--------------|
|           | Axletree | 97.3  | 77.0     | <b>98.7</b> | 84.0        | 98.4        | 82.5        | <b>98.7</b> | <b>84.9</b>  | <b>98.7</b>  |
| Box       | 96.7     | 62.1  | 98.6     | 81.1        | 98.2        | 66.3        | 98.5        | 80.0        | <b>99.0</b>  | <b>81.7</b>  |
| Can       | 98.1     | 81.7  | 99.1     | 90.5        | 99.1        | 86.6        | 98.8        | 91.9        | <b>99.1</b>  | <b>93.1</b>  |
| Chain     | 97.6     | 70.4  | 98.3     | <b>72.8</b> | <b>98.7</b> | 86.3        | 98.2        | 72.7        | 98.3         | 72.6         |
| Gear      | 94.2     | 74.9  | 94.7     | 83.4        | 94.7        | 80.5        | 94.2        | 85.2        | <b>94.8</b>  | <b>90.3</b>  |
| Keyring   | 97.7     | 74.6  | 99.1     | 77.6        | <b>99.3</b> | <b>85.4</b> | 99.1        | 74.1        | 99.2         | 80.8         |
| Motor     | 92.1     | 64.7  | 96.9     | 74.7        | 96.3        | 74.4        | <b>96.8</b> | 74.4        | <b>96.8</b>  | <b>79.6</b>  |
| Parts     | 95.7     | 60.1  | 97.7     | 79.0        | 97.4        | 79.7        | <b>97.8</b> | 78.1        | 97.6         | <b>82.2</b>  |
| Picker    | 94.6     | 55.8  | 96.9     | 70.3        | <b>97.2</b> | 73.0        | 96.9        | 68.5        | 96.9         | <b>75.3</b>  |
| Section   | 97.5     | 85.9  | 99.2     | 87.7        | 99.2        | 86.3        | 99.1        | 89.9        | <b>99.3</b>  | <b>92.5</b>  |
| Shaft     | 97.1     | 76.4  | 98.6     | 76.0        | 98.5        | 80.2        | <b>98.6</b> | <b>84.3</b> | <b>98.6</b>  | 79.5         |
| Spray_can | 98.4     | 99.1  | 99.4     | 99.3        | <b>99.5</b> | 99.6        | 99.3        | 99.3        | <b>99.5</b>  | <b>99.4</b>  |
| Spring    | 97.2     | 75.8  | 98.1     | 81.7        | 98.8        | <b>86.5</b> | <b>99.0</b> | 77.8        | 98.8         | 83.8         |
| Sprockets | 94.9     | 77.5  | 96.4     | 84.9        | 96.3        | 83.7        | <b>97.2</b> | 87.7        | <b>97.2</b>  | <b>89.0</b>  |
| Amphora   | 93.2     | 61.8  | 95.1     | 58.3        | <b>95.0</b> | 57.6        | 94.4        | 61.1        | 94.8         | <b>62.0</b>  |
| Teapot    | 91.9     | 52.4  | 96.3     | 64.4        | 93.6        | 49.9        | <b>95.8</b> | <b>73.3</b> | 95.4         | 71.4         |
| Mean      | 95.89    | 71.89 | 97.69    | 80.05       | 97.51       | 78.65       | 97.65       | 80.2        | <b>97.75</b> | <b>82.34</b> |

Table 5. Ablation study on PIAD\_synt (20%) with per-category results of the proposed components. The best performance is highlighted in **bold**.

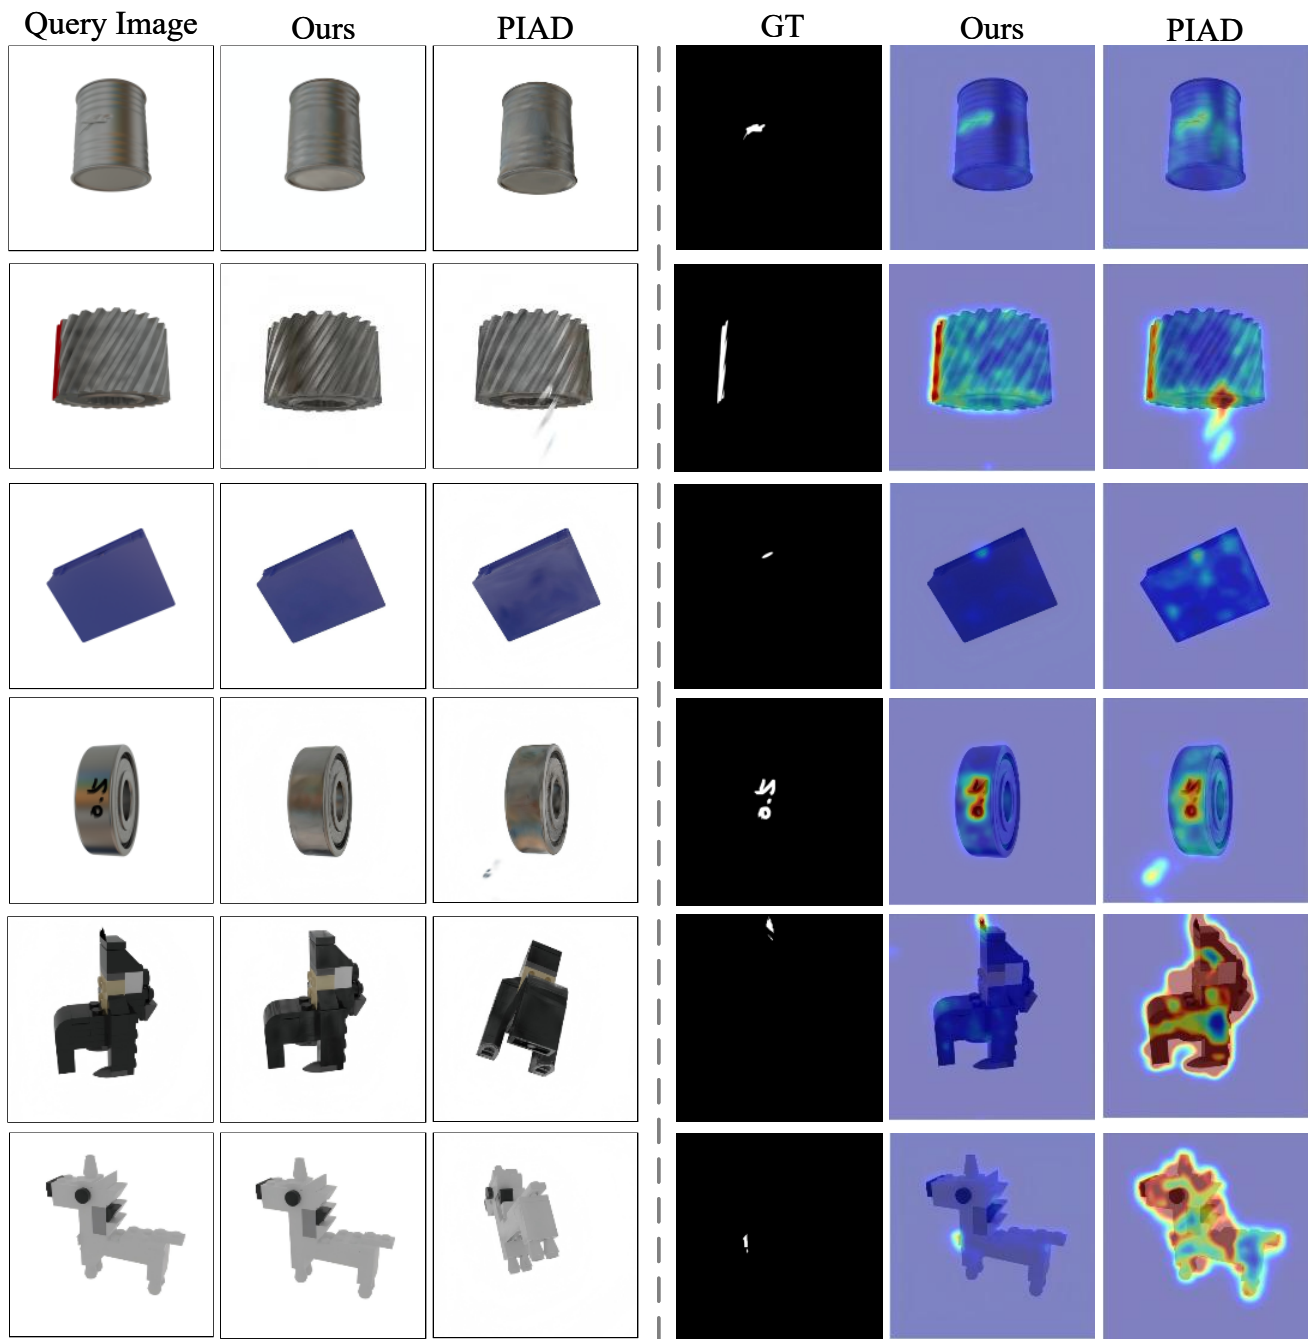

Figure 1. Qualitative visualization of pixel-wise anomaly segmentation compared to the state-of-the-art method PIAD in the 20% sparse view setting. The left side compares the rendered images produced by our method and baselines, while the right side visualizes the corresponding anomaly segmentation results.
